# Supplementary material for: Cryo-EM structures of the human sodium-potassium pump revealing the gating mechanism on the cytoplasmic side
Source: Research Square preprint supplement (doi:10.21203/rs.3.rs-557882/v1), 2021-06-03
Supplement: Supplementary file 1 [file 757b5a216a6b46363b60f7a4.docx]

**Materials and methods**

**Protein expression and purification.**

The full-length cDNA of human α1 (Gene name: ATP1A1, GenBank accession number: BAA00061.1) was subcloned into pCAG with N-terminal FLAG tag, β1 (Gene name: ATP1B1, GenBank accession number: CAA27385.1) into pCAG with C-terminal Strep tag and no tag γ2 (Gene name: FXYD2 ,GenBank accession number: AAG37906.1) into pCAG vector. For protein expression, α1, β1 and γ2 were co-expressed in HEK 293F cells (Invitrogen) which were cultured in SMM 293T-II medium (Sino Biological Inc.) at 37 °C under 5% CO2 in a Multitron-Pro shaker (Infors, 130 rpm). To transfect one liter of cells, 3 mg of polyethylenimines (PEIs) (Polysciences), 0.5 mg of the α1 plasmid, 0.5 mg of the β1 plasmid and 0.5 mg of the γ2 plasmid were preincubated with 50 mL fresh medium for 15 mins and added into cell culture whose cell density reached 2.0×106/ml. After 48 hours of transfection, cells were harvested by centrifugation at 3800×g for 10 mins and resuspended in a buffer containing 25 mM Tris (pH 8.0), 3mM MgCl2 and 150 mM NaCl or 100mM KCl for E1 or E2 state respectively, mixture of three protease inhibitors, aprotinin (1.3 μg/ml, AMRESCO), pepstatin (0.7 μg/ml, AMRESCO) and leupeptin (5 μg/ml, AMRESCO).

For protein purification, after incubating with 1.5% (w/v) n-dodecyl β-d-maltoside (DDM, Anatrace) supplemented with 0.1% (w/v) cholesteryl hemisuccinate Tris salt (Anatrace) at 4 °C for 2 hours, cells were centrifugated at 18,000×g for 1 hour to remove cell debris. The supernatant was loaded onto anti-FLAG M2 affinity resin (Sigma). The resin was washed with the wash buffer containing 25 mM Tris (pH 8.0), 3mM MgCl2,150 mM NaCl or 100 mM KCl, 0.04% GDN (w/v), following by protein eluted with wash buffer plus 0.2 mg/mL FLAG peptide. Then the protein complex was subjected to size-exclusion chromatography (Superose 6 Increase 10/300 GL, GE Healthcare) in buffer containing 25 mM Tris (pH 8.0), 3mM MgCl2,150 mM NaCl or 100 mM KCl and 0.02% GDN. The peak fractions were collected and concentrated for EM analysis.

**Cryo-EM sample preparation and data acquisition**

The purified hNKA (α1β1γ2 complex) was concentrated to ~ 9 mg/mL and incubated with 1 mM ATP analogue (adenosine 5’-O-(3-thio) triphosphate, ATPγS) in Na+ buffer 1 hours for E1·3Na·ATP state, absence of ATPγS for E1·3Na and in K+ buffer for E2·[2K] respectively, before being applied to the grids. Aliquots (3.3 μL) of the protein complex were placed on glow-discharged holey carbon grids (Quantifoil Au R1.2/1.3). The grids were blotted for 3s or 3.5 s and flash-frozen in liquid ethane cooled by liquid nitrogen with Vitrobot (Mark IV, Thermo Fisher Scientific). The cryo grids were transferred to a Titan Krios operating at 300 kV equipped with Gatan K3 Summit detector and GIF Quantum energy filter. Movie stacks were automatically collected using AutoEMation1, with a slit width of 20 eV on the energy filter and a defocus range from -1.2 µm to -2.2 µm in super-resolution mode at a nominal magnification of 81,000×. Each stack was exposed for 2.56 s with an exposure time of 0.08 s per frame, resulting in a total of 32 frames per stack. The total dose rate was approximately 50 e-/Å2 for each stack. The stacks were motion corrected with MotionCor22 and binned 2-fold, resulting in a pixel size of 1.087 Å/pixel. Meanwhile, dose weighting was performed3. The defocus values were estimated with Gctf4.

**Data processing**

Particles were automatically picked from manually selected micrographs using Relion 35-8. After 2D classification, good particles were selected and generated an initial 3D reference, then subjected to the global angular searching 3D classification using the initial model with only one class. For each of the last several iterations of the global angular searching 3D classification, a local angular searching 3D classification was performed, during which the particles were classified into 4 classes. Non-redundant good particles were selected from the local angular searching 3D classification. Then, these selected particles were subjected to multi-reference 3D classification, local defocus correction, 3D auto-refinement and post-processing.

The 2D classification, 3D classification and 3D auto-refinement were performed with Relion 3. The resolution was estimated with the gold-standard Fourier shell correlation 0.143 criterion9 with high-resolution noise substitution10.

**Model building and structure refinement**

The atomic models of the hNKA were built based on the corresponding cryo-EM maps. A Chainsaw11 model of the hNKA was first obtained using the previous structure of the sodium-potasium pump (PDB ID: 3KDP) as a template, which were further manually built in Coot12. Each residue was manually checked with the chemical properties considered during model building. Structure real space refinement was performed with Phenix13 with secondary structure and geometry restraints to prevent structure overfitting. To monitor the overfitting of the model, the model was refined against one of the two independent half maps from the gold-standard 3D refinement approach. Then, the refined model was tested against the other map. Statistics associated with data collection, 3D reconstruction and model refinement can be found in Table S1.





**Supplementary Fig. 1 | A simplified Post-Albers cycle for NKA.** Previously determined structures are available for three reaction intermediates (black boxes). Red boxes mark structures for E1·3Na·ATP, E1·3Na and E2·[2K] are described in this study. The cycle marked in red lines represent the physiological mode, and black dotted lines represent the unphysiological mode. Pi, inorganic phosphate. E1P/E2P indicate the phosphoenzyme intermediates. Brackets represent occluded states, and cyt and ext are short form for intracellular and extracellular, respectively.

**

**

**Supplementary Fig. 2 | Cryo-EM analysis of the hNKA complex. a**, SEC purification of hNKA in the presence of 0.02% GDN and 0.001% cholesteryl hemisuccinate (CHS). Left, SEC chromatogram; Right, SEC fractions were subjected to SDS–PAGE and visualized by Coomassie blue staining. **b,** Gold standard FSC curve of the overall structure of E1·3Na·ATP (blue), E1·3Na (orange) and E2·[2K] (green), respectively. **c** is for E1·3Na·ATP, **d** is for E1·3Na and **e** is for E1·[2K]. **ⅰ,** Euler angle distribution in the final 3D reconstruction. **ⅱ,** Local resolution map for the 3D reconstruction of whole map. **ⅲ,** FSC curve of the refined model versus the whole structure that it is refined against (black); of the model refined against the first half map versus the same map (red); and of the model refined against the first half map versus the second half map (green). The small difference between the red and green curves indicates that the refinement of the atomic coordinates did not suffer from overfitting.





**Supplementary Fig. 3 |Cryo-EM data processing.** **a,** Representative motion-corrected micrograph and 2D class averages. The scale bar in 2D class averages (right images) is 10 nm. The raw images are similar for all three samples; E1·3Na·ATP is shown. **b,** Flow chart of Cryo-EM data processing, please see the ‘Data Processing’ in Methods section for details.





**Supplementary Fig. 4 | Cryo-EM density maps. a,** Cryo-EM density map for ATPγS binding in the N domain pocket shown at threshold of 6 σ. **b,** Cryo-EM density map of the only TM helix of β1-subunit shown at threshold of 6 σ. **c,** Cryo-EM density map of the only TM helix of γ2-subunit shown at threshold of 4 σ. **d,** Cryo-EM density maps for the TM helices of α-subunit shown at threshold of 6 σ.





**Supplementary Fig. 5 | Structural comparison between the E1·3Na and the E1·3Na·ATP state of hNKA and the E1~P·[3Na]·ADP state of pig NKA. a,** The open cytoplasmic headpiece are shown in E1·3Na and E1·3Na·ATP, while the closed cytoplasmic headpiece is shown in pig NKA E1~P·[3Na]·ADP. **b,** The conformation of the M1e is nearly identical between the E1·3Na and the E1·3Na·ATP state. However, location of bound Na+ is different between the E1·3Na and the E1·3Na·ATP state. **c,** Compared with E1~P·[3Na]·ADP, the M1e of the E1·3Na·ATP state shifts towards the extracellular side for about 5 Å.

**

**

**Supplementary Fig. 6 | Conformational changes between the E1·3Na and E1·3Na·ATP state.**

**a,** Pivot role of Arg692 in P domain. Arg692 of P domain interacts with Glu512 of N domain in both E1·3Na and E1·3Na·ATP states. Arg692 also interact with ATP in E1·3Na·ATP states, which pivot N domain tilt. **b,** The position of Mg2+ changes between E1·3Na and E1·3Na·ATP states, and the surrounding 376DKTGTLT motif (black arrow) change slightly, which is connected to M4 through Pβ1, Pα1, Pβ0; and interact with Pβ6-Pα8, Pβ7-M5 loops near M5. **c,** The different positions of sodium ions in E1·3Na caused M5 to be broken (black arrow).





**Supplementary Fig. 7 | Structural comparison between** **hNKA in E2·[2K] and pig NKA in** **E2·[2K]·Pi. a,** Superposition between human E2·[2K] (blue to yellow) and pig E2·[2K]·Pi (gray), which are no difference. **b,** Disposition of the transmembrane helices of E2·[2K] and E2·[2K]·Pi viewed from the cytosolic side, approximately perpendicular to the membrane. **c, d,** Details around the phosphorylation site (**c**) and the hallmark 219TGES motif in the A domain (**d**) is highlighted, and the MgF4 as an analogue of inorganic phosphate (Pi) is represented by spheres.

**

**

**Supplementary Fig. 8 | Structural comparison between hNKA in** **E1·3Na·ATP and** **E2·[2K] state. a,** The α subunit of hNKA E1·3Na·ATP (blue to magenta) is superimposed to the E2·[2K] (wheat) state with the PN domain (598-710 residues) and M1-M7 helices. **b,** Disposition of the transmembrane helices viewed from the cytosolic side, approximately perpendicular to the membrane. **c,** The 219TGES motif of A domain has largely movement to expose the conserved phosphorylation site.





**Supplementary Fig. 9 | Structural comparison of SERCA in E1 state.** The crystal structure of SERCA in E1·Mg2+ (PDB code: 3W5B), in comparison with those of SERCA in E1·ATP·2Ca2+ (PDB code: 1T5S) and E1P·ADP·2Ca2+ (PDB code: 1T5T). Models are aligned with the M7-M10 helices. Asterisks indicate the position in A domain, which is interacted with N domain by ATP or ADP inducing conformational changes.

**



**

**Supplementary Figure 10 |Sequence alignment of the NKA.** α subunit of four human isoforms, pig isoform1 and shark isoform1. The hallmark motifs and the gate residue are shown by black boxed. Phosphorylation site is indicated by yellow cycle. Various colors are used to distinguish the cytoplasmic domain (A, light blue; P, light green; N, light pink). Gene and protein ID are as follows: AT1A1_human (Genebank: BAA00061.1), AT1A2_human (Genebank: AAA51797.1), AT1A3_human (Genebank: AAA51798.1), AT1A4_human (Genebank: AAQ07964.1), AT1A1_pig (Genebank: CAA27576.1), AT1A1_shark (Genebank: AJ781093.1).





**Supplementary Figure 11 | Cluster analysis of NKA structures.** Paired RMSD was computed forall of 34 structures of NKA, according to which a heatmap was generated, revealing two major groups that represent the E1 and the E2 conformation, respectively. The E2 conformation has two subgroups: E2·P (including 15 structures) and E2·Pi (including 14 structures). The E1 conformation also contains two subgroups: E1>E1P (including 3 structures) and a subgroup consisting of the E1·3Na·ATP and the E1·3Na state reported in current work. The color codes correspond to RMSD (unit: Angstrom).





**Supplementary Figure 12 | A model for the cytoplasmic gate** **control of NKA.** Schematic drawings of the cytosolic gate mechanism suggested from the present study of hNKA. The model is depicted almost with the same colours as in Fig. 1a. The three cytosolic domain A, P and N are coloured by marine, pink and blue. The M1 sliding door linked with A domain also colour in marine. NKA has an inward open K+/Na+-exchanging pathway in E1 state. ATP binding induces slightly N domain tilt and Na+ binding sites changes, but the cytoplasmic gate remains open. After the ATP hydrolysis and phosphoryl transfer reaction, the rearrangement of three cytosolic domains forms a close cytoplasmic headpiece. The movement and rotation of the A domain pull up the M1 helix after phosphorylation, to close the cytoplasmic gate.

**Supplementary Table 1 | Summary of data collection and model statistics for hNKA**

| **Dataset** | **E1·3Na·ATP** | **E1·3Na** | **E2·[2K]** |
| --- | --- | --- | --- |
| **Ligands** |  |  |  |
| Na+ | 150mM | 150mM | － |
| K+ | － | － | 100mM |
| Mg2+ | 3mM | 3mM | 3mM |
| ATPγS | 1mM | － | － |
| **Data collection** |  | | |
| EM equipment | Titan Krios (Thermo Fisher Scientific) | | |
| Voltage (kV) | 300 | | |
| Detector | Gatan K3 Summit | | |
| Energy filter | Gatan GIF Quantum, 20 eV slit | | |
| Pixel size (Å) | 1.087 | | |
| Electron dose (e-/Å2) | 50 | | |
| Defocus range (μm) | -1.2 ~ -2.2 | | |
| Sample | E1·ATP·3Na | E1·3Na | E2·[2K] |
| PDB code | 7E21 | 7E1Z | 7E20 |
| EMDB code | EMD-30949 | EMD-30947 | EMD-30948 |
| Number of collected micrographs | 2,304 | 3,758 | 3,940 |
| Number of selected micrographs | 1,902 | 3,079 | 3,588 |
| **3D Reconstruction** |  |  |  |
| Software | Relion 3.0 | | |
| Number of used particles | 218,652 | 140,363 | 372,093 |
| Resolution (Å) | 3.1 | 3.4 | 3.1 |
| Symmetry | C1 | | |
| Map sharpening B-factor (Å2) | -150 | | |
| **Refinement** |  | | |
| Software | Phenix | | |
| Cell dimensions |  | | |
| a=b=c (Å) | 217.4 | | |
| α=β=γ (˚) | 90 | | |
| Model composition |  | | |
| Protein residues | 1,310 | 1,310 | 1,324 |
| Side chains assigned | 1,310 | 1,310 | 1,324 |
| Sugar | 3 | 3 | 3 |
| ATPγS | 1 | 0 | 0 |
| Phospholipid | 4 | 4 | 4 |
| Cholesterol hemisuccinate | 7 | 7 | 7 |
| Na | 4 | 4 | 0 |
| K | 0 | 0 | 3 |
| Mg | 1 | 1 | 2 |
| Water | 0 | 4 | 0 |
| R.m.s deviations |  |  |  |
| Bonds length (Å) | 0.006 | 0.007 | 0.006 |
| Bonds Angle (˚) | 0.951 | 0.908 | 0.814 |
| Ramachandran plot statistics (%) |  |  |  |
| Preferred | 91.56 | 91.87 | 93.85 |
| Allowed | 8.05 | 8.05 | 6.15 |
| Outlier | 0.38 | 0.08 | 0.00 |

**Supplementary Movie 1**

The structural morph between the closed and open gate conformation of the NKA complex.

1. Lei, J. & Frank, J. Automated acquisition of cryo-electron micrographs for single particle reconstruction on an FEI Tecnai electron microscope. *J Struct Biol* **150**, 69-80 (2005).

2. Zheng, S.Q. et al. MotionCor2: anisotropic correction of beam-induced motion for improved cryo-electron microscopy. *Nat Methods* **14**, 331-332 (2017).

3. Grant, T. & Grigorieff, N. Measuring the optimal exposure for single particle cryo-EM using a 2.6 A reconstruction of rotavirus VP6. *Elife* **4**, e06980 (2015).

4. Zhang, K. Gctf: Real-time CTF determination and correction. *J Struct Biol* **193**, 1-12 (2016).

5. Kimanius, D., Forsberg, B.O., Scheres, S.H. & Lindahl, E. Accelerated cryo-EM structure determination with parallelisation using GPUs in RELION-2. *Elife* **5**(2016).

6. Scheres, S.H. A Bayesian view on cryo-EM structure determination. *J Mol Biol* **415**, 406-18 (2012).

7. Scheres, S.H. RELION: implementation of a Bayesian approach to cryo-EM structure determination. *J Struct Biol* **180**, 519-30 (2012).

8. Scheres, S.H. Semi-automated selection of cryo-EM particles in RELION-1.3. *J Struct Biol* **189**, 114-22 (2015).

9. Rosenthal, P.B. & Henderson, R. Optimal determination of particle orientation, absolute hand, and contrast loss in single-particle electron cryomicroscopy. *J Mol Biol* **333**, 721-45 (2003).

10. Chen, S. et al. High-resolution noise substitution to measure overfitting and validate resolution in 3D structure determination by single particle electron cryomicroscopy. *Ultramicroscopy* **135**, 24-35 (2013).

11. Winn, M.D. et al. Overview of the CCP4 suite and current developments. *Acta Crystallogr D Biol Crystallogr* **67**, 235-42 (2011).

12. Emsley, P., Lohkamp, B., Scott, W.G. & Cowtan, K. Features and development of Coot. *Acta Crystallogr D Biol Crystallogr* **66**, 486-501 (2010).

13. Adams, P.D. et al. PHENIX: a comprehensive Python-based system for macromolecular structure solution. *Acta Crystallogr D Biol Crystallogr* **66**, 213-21 (2010).
